1 **Hunting Eagles with glass mice: revisiting the inoculum effect for *Streptococcus pyogenes* with a**  
2 **hollow fibre infection model**

3

4 Darcy Marum,<sup>1,2</sup> Laurens Manning,<sup>1,3,4</sup> Edward Raby.<sup>1,3,5</sup>

5 1. Faculty of Health and Medical Sciences, University of Western Australia, Perth, Western  
6 Australia, Australia

7 2. Faculty of Health and Medical Sciences, The University of Sydney Medical Program,  
8 Sydney, The University of Sydney, Camperdown, New South Wales, Australia.

9 3. Department of Infectious Diseases, Fiona Stanley Hospital, Murdoch, Western Australia,  
10 Australia.

11 4. Wesfarmers Centre for Vaccines and Infectious Diseases, Telethon Kids Institute, Perth,  
12 Western Australia, Australia.

13 5. Department of Microbiology, PathWest Laboratory Medicine, Murdoch, Western  
14 Australia, Australia.

15

16

17

18

19 Address correspondence to [dmar6503@uni.sydney.edu.au](mailto:dmar6503@uni.sydney.edu.au)

20

21

22

23

24

25

26 **Abstract**

27 **Background**

28 Severe, invasive *Streptococcus pyogenes* (Strep A) infections result in greater than 500,000  
29 deaths annually. First line treatment for such infections is combination benzylpenicillin and  
30 clindamycin, but treatment failure can occur with this regimen. This failure has been partially  
31 attributed to the inoculum effect, which presents as reduced antibiotic susceptibility during  
32 high bacterial density and plateau-phase growth. Hollow fibre infection models (HFIM) have  
33 been proposed as an alternative to *in vivo* research to study these effects.

34 **Objectives**

35 To re-evaluate the inoculum effect for benzylpenicillin, clindamycin, linezolid and  
36 trimethoprim-sulfamethoxazole using a Strep A HFIM.

37 **Methods**

38 Differential antibiotic susceptibility of Strep A was measured in a HFIM starting from low-  
39 and high-density inocula. Dynamic antibiotic concentrations were delivered over 48 hours to  
40 simulate human pharmacokinetics. Differences in antibiotic susceptibility were determined at  
41 24 and 48 hours by plate count of remaining viable colony-forming units.

42 **Results**

43 Inoculum effects were seen in benzylpenicillin and linezolid at 24 hours, and benzylpenicillin,  
44 linezolid and clindamycin at 48 hours. The effect size was greatest for continuously infused  
45 benzylpenicillin. No inoculum effect was seen in trimethoprim-sulfamethoxazole.

46 **Conclusions**

47 Inoculum effects were seen in the HFIM model using benzylpenicillin, linezolid and  
48 clindamycin, which may predict reduced clinical efficacy following treatment delay. The  
49 model has proven robust and largely in agreement with published data, recommending it for  
50 further Strep A study.

51

## 52 **Introduction**

53 *Streptococcus pyogenes* (Strep A) is an important human pathogen with diverse manifestations  
54 ranging from mild pharyngitis and skin infections to life-threatening invasive disease.<sup>1</sup> The  
55 burden of disease in Australia remains high, particularly among the Indigenous population, and  
56 disease mitigation efforts are hampered by inconsistent mandatory reporting requirements<sup>2</sup>.  
57 Penicillin remains the cornerstone antibiotic for established infections and, in the absence of  
58 an effective vaccine, for subsequent secondary prevention. However, for severe infections a  
59 second antibiotic such as clindamycin is commonly added to improve clinical outcomes, an  
60 approach often justified by the understanding that bacteria may display differential  
61 susceptibility to antibiotics at different population densities and growth phases.<sup>3</sup> This  
62 phenomenon, termed the ‘inoculum effect’ was first described *in vivo* by Harry Eagle in 1952  
63 who reported a murine myositis model of Strep A infection which showed that mice with a  
64 higher initial inoculum had decreased survival.<sup>4</sup> Using the same animal infection model, and  
65 with findings replicated in static *in vitro* models, subsequent studies have demonstrated that  
66 the addition of clindamycin significantly improved outcomes. Stevens et al. demonstrated this  
67 effect was more pronounced with increasing inoculum or treatment delay.<sup>5, 6</sup> In parallel,  
68 minimum inhibitory concentrations (MIC) rose with increasing inoculum.<sup>6</sup> An *in vitro*  
69 inoculum effect has also been observed for clindamycin and vancomycin in the treatment of  
70 *Staphylococcus aureus* and has been proposed as a mechanistic explanation for improved  
71 outcomes observed with dual therapy with these agents for severe skin and soft tissue  
72 infections.<sup>7, 8</sup>

73

74 Extrapolating the results of mouse and static *in vitro* models to clinically relevant effects in  
75 humans may not necessarily be valid and should be interpreted in the context of likely *in vivo*  
76 antibiotic exposures. In the studies by Eagle and Stevens, the penicillin dosing and duration of

77 therapy relative to the MIC did not replicate typical unbound antibiotic exposures observed in  
78 human infections treated with contemporary intravenous doses.<sup>4, 6</sup>

79

80 To explore the implications of this, we established a dynamic hollow fibre infection model  
81 (HFIM) of Strep A infection. This HFIM was applied to accurately replicate *in vivo* antibiotic  
82 exposure profiles typically seen with antibiotic therapy (figure 1). In this experiment, the  
83 inoculum effect was revisited using a well-characterised Strep A strain exposed to  
84 benzylpenicillin, clindamycin, linezolid, and trimethoprim/sulfamethoxazole (SXT). The latter  
85 two antibiotics were included as future alternatives for clindamycin to which resistance is  
86 rising<sup>9</sup>, in particular linezolid which has previously been demonstrated as effective in the  
87 treatment of necrotising Strep A infections<sup>10</sup>. The activity of SXT against Strep A has  
88 historically been questioned but recent *in vitro* and human data demonstrate a clinically  
89 relevant effect.<sup>11, 12</sup> Given increasing interest in delivering beta-lactam therapy by continuous  
90 infusion in intensive care or outpatient settings, we also compared this route of administration  
91 with conventional bolus dosing of benzylpenicillin.

## 92 **Materials and Methods**

### 93 *Characterisation of Strep A isolate*

94 Isolates were cultured and introduced to the HFIM from a frozen glycerol stock of strain  
95 HKU488 (BioSample: SAMEA1523579\*). This isolate is an example of a globally-distributed  
96 strain expressing M-type 1, and notable as a cause of high rates of invasive and disseminated  
97 infection.<sup>13</sup> Using previously described broth dilution techniques,<sup>14</sup> the MICs for

---

\* Sample meta-data are available in the BioSamples database (<http://www.ebi.ac.uk/biosamples>) under accession number SAMEA1523579, or at <https://www.ebi.ac.uk/biosamples/samples/SAMEA1523579>

98 benzylpenicillin, clindamycin, linezolid and SXT were confirmed to be 0.005625, 0.045, 2 and  
99 0.64 mg/L respectively, indicating susceptibility to these antibiotics as per EUCAST criteria.<sup>15</sup>

#### 100 ***Standard Growth Curve and Growth Phases in the HFIM***

101 A thawed sample (0.05mL) was cultured on HBA from frozen glycerol stock of strain HKU488  
102 (24 hours, 37°C, 5% CO<sub>2</sub>). A sample from a single colony was introduced to the HFIM running  
103 under standard experimental conditions (37°C with media recirculation via peristaltic pump).  
104 Bacterial densities were determined via dilutional plate count in triplicate at 0, 4, 8, 24, 32, 74  
105 and 96 hours. Growth phases were determined by analysis of the resulting growth curve (figure  
106 3).

#### 107 ***Pharmacokinetic parameters***

108 Pharmacokinetic attributes were modelled to emulate *in vivo* unbound antibiotic exposure  
109 conditions expected in human dosing regimens (table 1).

#### 110 ***Sample Preparation and Acclimatisation***

111 Strep A samples were derived from a common culture of HKU488. A single colony from 48-  
112 hour growth on horse blood agar (HBA) was incubated at 37°C in CAMHB for 24 hours to  
113 reach the early plateau phase of growth. High ( $\geq 10^8$  cfu/mL) and low ( $\leq 10^7$  cfu/mL) inocula  
114 were obtained by introduction of 10mL and 100 $\mu$ L, respectively into each hollow fibre flow  
115 cell to produce an initial hundred-fold difference in concentration. The bacteria were then  
116 acclimatised to the HFIM under standard experimental conditions (37°C with media  
117 recirculation via peristaltic pump at 14 rpm) for 16 hours, allowing the low inoculum group to  
118 re-enter exponential phase growth while the high inoculum remained in plateau phase.  
119 Bacterial densities were measured by dilutional plate count in triplicate immediately prior to  
120 antibiotic introduction (table 2).

121 Antibiotics were introduced at defined doses and intervals reflecting clinical dosing regimens  
122 (table 3) and the viable cfu/mL serially measured over 48 hours following antibiotic exposure.  
123 Samples (1mL) were collected aseptically from the flow cell at 0, 4, 8, 24, 32, and 48 hours,  
124 centrifugally pelleted (6000 RCF, 3 minutes) and resuspended in isotonic saline to preserve  
125 viability and remove residual antibiotic.

### 126 *Viable cell density enumeration by plate count and microscopy*

127 The density of viable bacteria following antibiotic exposure was measured from each sample.  
128 Bacterial concentration was estimated via NanoDrop 2000c (ThermoFisher Scientific) optical  
129 density readings and a defined-volume fluorescent cell counting method, and dilutional plate  
130 counts (HBA) were made in triplicate based on this estimation. Colony forming units were  
131 counted following plate incubation (24 hours, 37°C, 5% CO<sub>2</sub>) and expressed as log<sub>10</sub> decrease  
132 in cfu/mL from baseline. From these measurements, the difference in bactericidal activity  
133 between low- and high-inoculum groups was calculated. Due to a lack of consistent definitions  
134 across different studies, we considered a difference of greater than 10 times (1 log<sub>10</sub>-fold) to  
135 represent an inoculum effect.<sup>3, 16, 17</sup>

## 136 **Results**

137 At 24 hours, a moderate difference between high and low inocula was observed for bolus-dosed  
138 benzylpenicillin; a log<sub>10</sub>-fold difference of 1.34. A greater log<sub>10</sub>-fold difference of 3.78 was  
139 seen in the continuously infused benzylpenicillin group. Modest differences between high and  
140 low inocula were observed with clindamycin (0.79) and linezolid (1.50) but no significant  
141 difference with SXT (0.17). Notably, benzylpenicillin showed by far the greatest reduction in  
142 cfu/mL at 24 hours in the low inoculum arm but continuously infused benzylpenicillin and  
143 linezolid showed less than 1 log<sub>10</sub> reduction in the high inoculum arm (table 4 and figure 2).

144 At 48 hours there was no observed difference (0.065) between low and high inoculum arms in  
145 the bolus-dosed benzylpenicillin group in contrast to continuous-infusion benzylpenicillin  
146 which showed a log<sub>10</sub>-fold difference of 4.02. The pattern was otherwise similar with modest  
147 differences for clindamycin (1.23) and linezolid (2.64) and minimal difference for SXT (0.40).

## 148 **Discussion**

### 149 **Definition of Inoculum Effect**

150 Heterogeneity exists in the literature<sup>16</sup> regarding how to define the inoculum effect; as such, a  
151 10-fold change in viable bacterial concentration between groups at 24 and 48 hours was chosen  
152 as an appropriate effect size. Others have quantified this effect as either an increase in MIC,<sup>3</sup>  
153 or as a time-kill rate.<sup>17</sup>

### 154 **Inoculum Effect of Penicillin**

155 A large inoculum effect was observed with benzylpenicillin delivered as a continuous infusion  
156 at 24 hours, with a substantial difference in bactericidal activity between low and high inocula.  
157 This has implications for the use of penicillin (and beta-lactams generally) in the treatment of  
158 established infections, or in other cases of high bacterial load such as following delayed  
159 antibiotic administration. These results emphasise the importance of early intervention, or  
160 possibly the selection of an alternate antibiotic class unaffected by the inoculum effect, if this  
161 is not possible.

162 Bolus-dosed benzylpenicillin achieved high bactericidal activity in both high and low inoculum  
163 groups, only displaying an inoculum effect at 24 hours. The likely explanation is a feature of  
164 this HFIM specific to the experimental requirements of bolus-dosed benzylpenicillin. To  
165 simulate the *in vivo* clearance rate of benzylpenicillin, large volumes of CAMHB were used,  
166 approaching four litres per day (compared to less than one litre for other experiments). While

167 necessary to simulate physiologically accurate clearance rates, this continuous provision of  
168 fresh media may have hindered both nutritional depletion and waste product accumulation that  
169 have been hypothesised as the drivers of the inoculum effect.<sup>4</sup> It is possible that high flow rates  
170 also removed quorum sensing and other bacterial signalling molecules. These molecules induce  
171 changes in metabolic phenotypes associated with variation in antimicrobial resistance. In  
172 particular, the LuxS/AI-2 signalling system has been shown to alter Strep A virulence factor  
173 expression and capsule production,<sup>18, 19</sup> and is known to modulate penicillin resistance in  
174 *Streptococcus pneumoniae* and *Staphylococcus aureus*.<sup>20, 21</sup>

175 This hypothesis is supported by the observation of an inoculum effect at 24 hours. At this point  
176 in the experiment bacterial density (and the resulting metabolites, waste products and quorum  
177 sensing molecules) was much higher, and it is likely that this counteracted the high media flow.  
178 This suggests that the HFIM is best suited to high bacterial density experiments, or to those  
179 involving antibiotics with lower *in vivo* clearance rates.

### 180 **Clindamycin Inoculum Effect**

181 Significant differences in bactericidal activity were observed at 24 and 48 hours. Current *in*  
182 *vivo* studies are mixed in their prediction of an inoculum effect - previous models of mouse  
183 myositis caused by Strep A infection did not show a strong correlation between inoculum size  
184 and bacterial survival,<sup>5</sup> while *in vitro* studies have demonstrated<sup>6</sup> an increase in MBC in higher  
185 density populations, although not necessarily an inoculum effect. It is likely that these  
186 inconsistent *in vitro* and *in vivo* results stem from clindamycin's inhibition of bacterial  
187 exotoxins,<sup>22</sup> which may modulate both bacterial virulence and the immune response *in vivo*  
188 which is not modelled in the HFIM.



## 189 **Linezolid Inoculum Effect**

190 A significant inoculum effect was observed with linezolid at both 24 and 48 hours. While  
191 current *in vivo* studies detailing this effect are lacking in Strep A, this result accords with  
192 previous *in vivo* studies of a murine streptococcal infection model using *Streptococcus*  
193 *pneumoniae*.<sup>23</sup> Bactericidal activity was no more than that achieved by benzylpenicillin against  
194 the high inoculum, suggesting that linezolid is a useful adjunct to, but not a replacement for  
195 penicillin.

## 196 **Lack of Trimethoprim/sulfamethoxazole Inoculum Effect**

197 There was no inoculum effect demonstrated in trimethoprim/sulfamethoxazole. Inoculum  
198 effects in SXT have been previously observed in Strep A *in vitro*<sup>24</sup>, however, current *in vivo*  
199 studies are unavailable and further research is needed. If the absence of the inoculum effect is  
200 reflected in *in vivo* data, SXT may find use in the treatment of late-stage infections with high  
201 bacterial density which are not sufficiently susceptible to other antibiotics.

## 202 **Bacterial Acclimatisation and Separation of cfu/mL Values**

203 An extended period of bacterial acclimatisation within the HFIM was included in the  
204 experimental protocol to ensure that bacteria of the low inoculum model had time to revert to  
205 log-phase growth from their original early plateau phase source culture. However, this made  
206 accurately controlling the initial cfu/mL values in the HFIM in each group challenging, as the  
207 cells of the two cultures exhibited different doubling times and subsequently had unequal  
208 growth over the acclimatisation period. This led to lower than intended cfu/mL value separation  
209 between the initial high and low inoculum groups in some experiments; most notably the  
210 populations receiving bolus-dosed benzylpenicillin. The separation deficit had the potential to  
211 mask or reduce any difference in the two groups. However, the obtained results showed

212 significant differences in antibiotic susceptibility between the groups at 24 hours, suggesting  
213 that growth phase of the bacterial population has greater effect on the manifestation of the  
214 inoculum effect than absolute cell density. It is uncertain whether this conclusion can be  
215 extended to other antibiotics – it is possible that in some antibiotics the advent of the effect  
216 may be growth phase-dependent (as it appears to be with penicillin), while cell count may be  
217 of primary importance in others.

### 218 **Use of Cation-adjusted Mueller-Hinton Broth**

219 Strep A has been previously thought to be only marginally susceptible to trimethoprim-  
220 sulfamethoxazole. This may have been due to the media on which its susceptibility has  
221 historically been assayed. SXT acts by blocking two steps in folic acid metabolism, preventing  
222 downstream thymidine synthesis, a mechanism which may have been circumvented by  
223 performing susceptibility testing on media containing thymidine. Cation-adjusted Mueller-  
224 Hinton broth was chosen for its low, defined thymidine content which would not mask  
225 susceptibility, and under these conditions the results showed that Strep A is susceptible to SXT.  
226 It is unknown whether this observation can be generalised to *in vivo* susceptibility, as serum  
227 thymidine concentration cannot be regulated to the extent possible in artificial media. However,  
228 previous studies have measured the human serum concentration of thymidine at approximately  
229 0.02-0.01  $\mu\text{g/mL}$ <sup>25</sup>, lower than that present in Mueller-Hinton blood agar (MHBA), which  
230 when cultured with Strep A produces SXT-susceptible organisms<sup>12</sup>.

### 231 **Validation of the HFIM of *Strep A* Infection**

232 Previous experimental data on Strep A infection and data produced in the hollow fibre infection  
233 model during this research is mostly in agreement. An inoculum effect has previously been  
234 reported<sup>5</sup> in penicillin in a murine model of Strep A myositis, as well as being seen clinically  
235 as a cause of penicillin monotherapy failure. Our results support this conclusion, with the

236 continuously infused benzylpenicillin group displaying an inoculum effect at 24 and 48 hours,  
237 and in the bolus-dosed group at 24 hours. As previously highlighted, the effect was not seen at  
238 48 hours, possibly due to the loss of quorum sensing and other signalling molecules by the high  
239 flow of media, which prevented the advent of the inoculum effect after bacterial population fell  
240 below a certain level. As such, the use of the HFIM for Strep A research may be better suited  
241 to antibiotics with lower clearance rates, or high clearance rate antibiotics alongside high  
242 bacterial concentrations.

243 The generalisability of the HFIM to clinical research was further borne out by the results of the  
244 clindamycin experiment, which showed no inoculum effect at 24 hours and one of small  
245 magnitude at 48 hours. Previous literature has been mixed in reporting an inoculum effect, with  
246 *in vitro* studies<sup>6</sup> showing an effect (albeit generally of lesser magnitude than seen in  
247 benzylpenicillin), while murine models have failed to demonstrate this.<sup>5</sup> These results suggest  
248 that the HFIM may represent a more nuanced approximation of Strep A infection that is closer  
249 to an *in vivo* model than previously achieved *in vitro*.

250 Our literature search was unable to identify any studies on the inoculum effect of linezolid in  
251 Strep A. However, murine models of *Streptococcus pneumoniae* and *Staphylococcus aureus*  
252 treated with linezolid have noted the effect.<sup>23</sup> Further research is needed to confirm whether it  
253 is present in *in vivo* models of Strep A infection as is suggested by the HFIM model. Similarly,  
254 no animal studies trialling SXT for an inoculum effect were found, although a modest effect  
255 was seen for both Strep A and *Haemophilus influenzae* in *in vitro* testing.<sup>24</sup> This is a possible  
256 point of discrepancy between the HFIM and previous literature; additional investigation must  
257 be completed in animal models to assess the relevance of the HFIM to the study of SXT  
258 inoculum effects *in vivo*. Simulation of combination therapy should also be explored and would  
259 be feasible with the HFIM.

## 260 Acknowledgements

261 This work was supported by the Spinnaker Health Research Foundation (FHMRF 2016).

## 262 Transparency and Declarations

263 None to declare

## 264 References

- 265 1. E. A, L. T. *Streptococcus pyogenes : Basic Biology to Clinical Manifestations*  
266 Oklahoma City: University of Oklahoma Health Sciences Center, 2016.
- 267 2. Wright CM, Langworthy K, Manning L. The Australian burden of invasive group A  
268 streptococcal disease - a narrative review. *Intern Med J* 2020; **n/a**.
- 269 3. Brook I. Inoculum effect. *Rev Infect Dis* 1989; **11**: 361-8.
- 270 4. Eagle H. Experimental approach to the problem of treatment failure with penicillin. I.  
271 Group A streptococcal infection in mice. *Am J Med* 1952; **13**: 389-99.
- 272 5. Stevens DL, Gibbons AE, Bergstrom R et al. The Eagle effect revisited: efficacy of  
273 clindamycin, erythromycin, and penicillin in the treatment of streptococcal myositis. *J Infect*  
274 *Dis* 1988; **158**: 23-8.
- 275 6. Stevens DL, Yan S, Bryant AE. Penicillin-binding protein expression at different  
276 growth stages determines penicillin efficacy in vitro and in vivo: an explanation for the  
277 inoculum effect. *J Infect Dis* 1993; **167**: 1401-5.
- 278 7. Wargo KA, McCreary EK, English TM. Vancomycin Combined With Clindamycin for  
279 the Treatment of Acute Bacterial Skin and Skin-Structure Infections. *Clinical infectious*  
280 *diseases : an official publication of the Infectious Diseases Society of America* 2015; **61**: 1148-  
281 54.
- 282 8. Bland CM, Bookstaver PB. Editorial Commentary: Double Gram-Positive Coverage  
283 for Acute Bacterial Skin and Skin Structure Infections: Has the Eagle Landed? *Clinical*  
284 *infectious diseases : an official publication of the Infectious Diseases Society of America* 2015;  
285 **61**: 1155-6.
- 286 9. Ikebe T, Wada A, Oguro Y et al. Emergence of Clindamycin-Resistant *Streptococcus*  
287 *pyogenes* Isolates Obtained from Patients with Severe Invasive Infections in Japan. *Jpn J Infect*  
288 *Dis* 2010; **63**: 304-5.
- 289 10. Bryant AE, Bayer CR, Aldape MJ et al. Emerging erythromycin and clindamycin  
290 resistance in group A streptococci: Efficacy of linezolid and tedizolid in experimental  
291 necrotizing infection. *J Glob Antimicrob Resist* 2020; **22**: 601-7.
- 292 11. Bowen AC, Carapetis JR, Currie BJ et al. Sulfamethoxazole-Trimethoprim  
293 (Cotrimoxazole) for Skin and Soft Tissue Infections Including Impetigo, Cellulitis, and  
294 Abscess. *Open Forum Infect Dis* 2017; **4**: ofx232.
- 295 12. Bowen AC, Lilliebridge RA, Tong SYC et al. Is *Streptococcus pyogenes* Resistant or  
296 Susceptible to Trimethoprim-Sulfamethoxazole? *Journal of Clinical Microbiology* 2012; **50**:  
297 4067-72.
- 298 13. Aziz RK, Kotb M. Rise and persistence of global MIT1 clone of *Streptococcus*  
299 *pyogenes*. *Emerg Infect Dis* 2008; **14**: 1511-7.
- 300 14. Microbiology ECfASTotESoC, Diseases I. Determination of minimum inhibitory  
301 concentrations (MICs) of antibacterial agents by broth dilution. *Clinical Microbiology and*  
302 *Infection* 2003; **9**: ix-xv.

- 303 15. Breakpoint tables for interpretation of MICs and zone diameters. In: Testing TECoAS,  
304 ed, 2018.
- 305 16. Lenhard JR, Bulman ZP. Inoculum effect of beta-lactam antibiotics. *J Antimicrob*  
306 *Chemother* 2019; **74**: 2825-43.
- 307 17. Mercier RC, Stumpo C, Rybak MJ. Effect of growth phase and pH on the in vitro  
308 activity of a new glycopeptide, oritavancin (LY333328), against *Staphylococcus aureus* and  
309 *Enterococcus faecium*. *J Antimicrob Chemother* 2002; **50**: 19-24.
- 310 18. Lyon WR, Madden JC, Levin JC et al. Mutation of luxS affects growth and virulence  
311 factor expression in *Streptococcus pyogenes*. *Mol Microbiol* 2001; **42**: 145-57.
- 312 19. Marouni MJ, Sela S. The luxS gene of *Streptococcus pyogenes* regulates expression of  
313 genes that affect internalization by epithelial cells. *Infect Immun* 2003; **71**: 5633-9.
- 314 20. Rogers PD, Liu TT, Barker KS et al. Gene expression profiling of the response of  
315 *Streptococcus pneumoniae* to penicillin. *J Antimicrob Chemother* 2007; **59**: 616-26.
- 316 21. Xue T, Zhao L, Sun B. LuxS/AI-2 system is involved in antibiotic susceptibility and  
317 autolysis in *Staphylococcus aureus* NCTC 8325. *Int J Antimicrob Ag* 2013; **41**: 85-9.
- 318 22. Sawai J, Hasegawa T, Kamimura T et al. Growth phase-dependent effect of  
319 clindamycin on production of exoproteins by *Streptococcus pyogenes*. *Antimicrob Agents*  
320 *Chemother* 2007; **51**: 461-7.
- 321 23. Lee D-G, Murakami Y, Andes DR et al. Inoculum Effects of Ceftobiprole, Daptomycin,  
322 Linezolid, and Vancomycin with *Staphylococcus aureus* and *Streptococcus pneumoniae* at  
323 Inocula of 105 and 107 CFU Injected into Opposite Thighs of Neutropenic Mice. *Antimicrobial*  
324 *Agents and Chemotherapy* 2013; **57**: 1434-41.
- 325 24. Leers WD. In vitro sensitivity of hemophilus influenzae and streptococcus pyogenes to  
326 co-trimoxazole. *Canadian Medical Association Journal* 1975; **112**: 59-63.
- 327 25. Nottebrock H, Then R. Thymidine concentrations in serum and urine of different  
328 animal species and man. *Biochem Pharmacol* 1977; **26**: 2175-9.
- 329 26. Visser LG, Arnouts P, van Furth R et al. Clinical pharmacokinetics of continuous  
330 intravenous administration of penicillins. *Clinical infectious diseases : an official publication*  
331 *of the Infectious Diseases Society of America* 1993; **17**: 491-5.
- 332 27. LaPlante KL, Leonard SN, Andes DR et al. Activities of clindamycin, daptomycin,  
333 doxycycline, linezolid, trimethoprim-sulfamethoxazole, and vancomycin against community-  
334 associated methicillin-resistant *Staphylococcus aureus* with inducible clindamycin resistance  
335 in murine thigh infection and in vitro pharmacodynamic models. *Antimicrob Agents Chemother*  
336 2008; **52**: 2156-62.

337

338 **Table 1.** Predicted pharmacokinetic profiles of antibiotics in hollow fibre infection model of *Streptococcus pyogenes*

| Antibiotic                         | t <sub>1/2</sub><br>(Hours) | C <sub>max</sub><br>(mg/L) | Protein Bound<br>(1 - f) (%) | fC <sub>max</sub><br>(mg/L) | fC <sub>min</sub><br>(mg/L) | fAUC <sub>0,24</sub><br>(mg/L·h) | t > MIC<br>(%) | t > MBC<br>(%) | Reference     |
|------------------------------------|-----------------------------|----------------------------|------------------------------|-----------------------------|-----------------------------|----------------------------------|----------------|----------------|---------------|
| Benzylpenicillin<br>(Intermittent) | 0.7                         | 400                        | 0.60                         | 160                         | 3.21                        | 980                              | 100            | 100            | <sup>26</sup> |
| Benzylpenicillin<br>(Continuous)   | -                           | 20                         | 0.60                         | 8                           | 8                           | 192                              | 100            | 100            | <sup>26</sup> |
| Clindamycin                        | 4                           | 8.3                        | 0.77                         | 1.91                        | 0.48                        | 10.84                            | 100            | -              | <sup>27</sup> |
| Linezolid                          | 5                           | 13.4                       | 0.13                         | 11.66                       | 2.23                        | 149.50                           | 100            | 0              | <sup>27</sup> |
| Trimethoprim-<br>Sulfamethoxazole  | 10                          | 40                         | 0.53                         | 18                          | 7.87                        | 357.20                           | 100            | -              | <sup>27</sup> |

339

340 **Table 2.** Measured bacterial concentrations in cfu/mL immediately prior to antibiotic introduction for each antibiotic, divided into high and low  
341 initial inoculum groups.

| Antibiotic                 | Benzylpenicillin<br>(Continuous) |          | Benzylpenicillin<br>(Bolus) |          | Clindamycin |          | Linezolid |          | SXT      |          |
|----------------------------|----------------------------------|----------|-----------------------------|----------|-------------|----------|-----------|----------|----------|----------|
|                            | High                             | Low      | High                        | Low      | High        | Low      | High      | Low      | High     | Low      |
| cfu/mL<br>(point estimate) | 1.02E+09                         | 1.58E+07 | 4.03E+08                    | 7.87E+07 | 2.75E+08    | 9.56E+06 | 8.15E+08  | 2.50E+07 | 9.99E+09 | 6.70E+07 |

342

343 **Table 3.** Antibiotic dose and frequency together with central reservoir volume and pump settings for different antibiotics in hollow fibre model of  
 344 *Streptococcus pyogenes*

| <b>Antibiotic</b>                   | <b>Benzylicillin<br/>(Bolus Dosed)</b> | <b>Benzylicillin<br/>(Continuous)</b>            | <b>Clindamycin</b> | <b>Linezolid</b> | <b>Trimethoprim-<br/>sulphmethoxazole</b> |
|-------------------------------------|----------------------------------------|--------------------------------------------------|--------------------|------------------|-------------------------------------------|
| <b>Antibiotic Dose</b>              | 20 mg                                  | Maintained at a free<br>concentration of 20 mg/L | 0.38 mg            | 2.33 mg          | 0.23 mg                                   |
| <b>Dose Frequency</b>               | 4 Hours                                | -                                                | 8 Hours            | 12 Hours         | 12 Hours                                  |
| <b>Central Reservoir<br/>Volume</b> | 125 mL                                 | 200 mL                                           | 200 mL             | 200 mL           | 200 mL                                    |
| <b>Peristaltic Pump RPM</b>         | 41.25                                  | 10                                               | 11.55              | 9.24             | 4.62                                      |

345

346

347

348

349 **Table 4.** Decrease in colony forming units at high and low inocula at 24 and 48 hours following different antibiotics in the hollow fibre infection  
 350 model of *Streptococcus pyogenes*. All units are expressed in terms of log<sub>10</sub>-fold cfu/mL decrease from initial concentration.

| Antibiotic                    | Colony forming units at 24 hours incubation |              |             | Colony forming units at 48 hours incubation |              |             |
|-------------------------------|---------------------------------------------|--------------|-------------|---------------------------------------------|--------------|-------------|
|                               | High inoculum                               | Low inoculum | Difference  | High inoculum                               | Low inoculum | Difference  |
| Benzylpenicilin (Bolus)       | 3.97                                        | 5.31         | <b>1.34</b> | 7.02                                        | 6.95         | 0.065       |
| Benzylpenicilin (Continuous)  | 0.87                                        | 4.65         | <b>3.78</b> | 2.61                                        | 6.63         | <b>4.02</b> |
| Clindamycin                   | 2.13                                        | 2.92         | 0.79        | 2.87                                        | 4.10         | <b>1.23</b> |
| Linezolid                     | 0.74                                        | 2.24         | <b>1.50</b> | 1.82                                        | 4.47         | <b>2.64</b> |
| Trimethoprim-Sulfamethoxazole | 2.46                                        | 2.29         | 0.17        | 3.88                                        | 3.47         | 0.40        |

351



352 **Figure 1.**

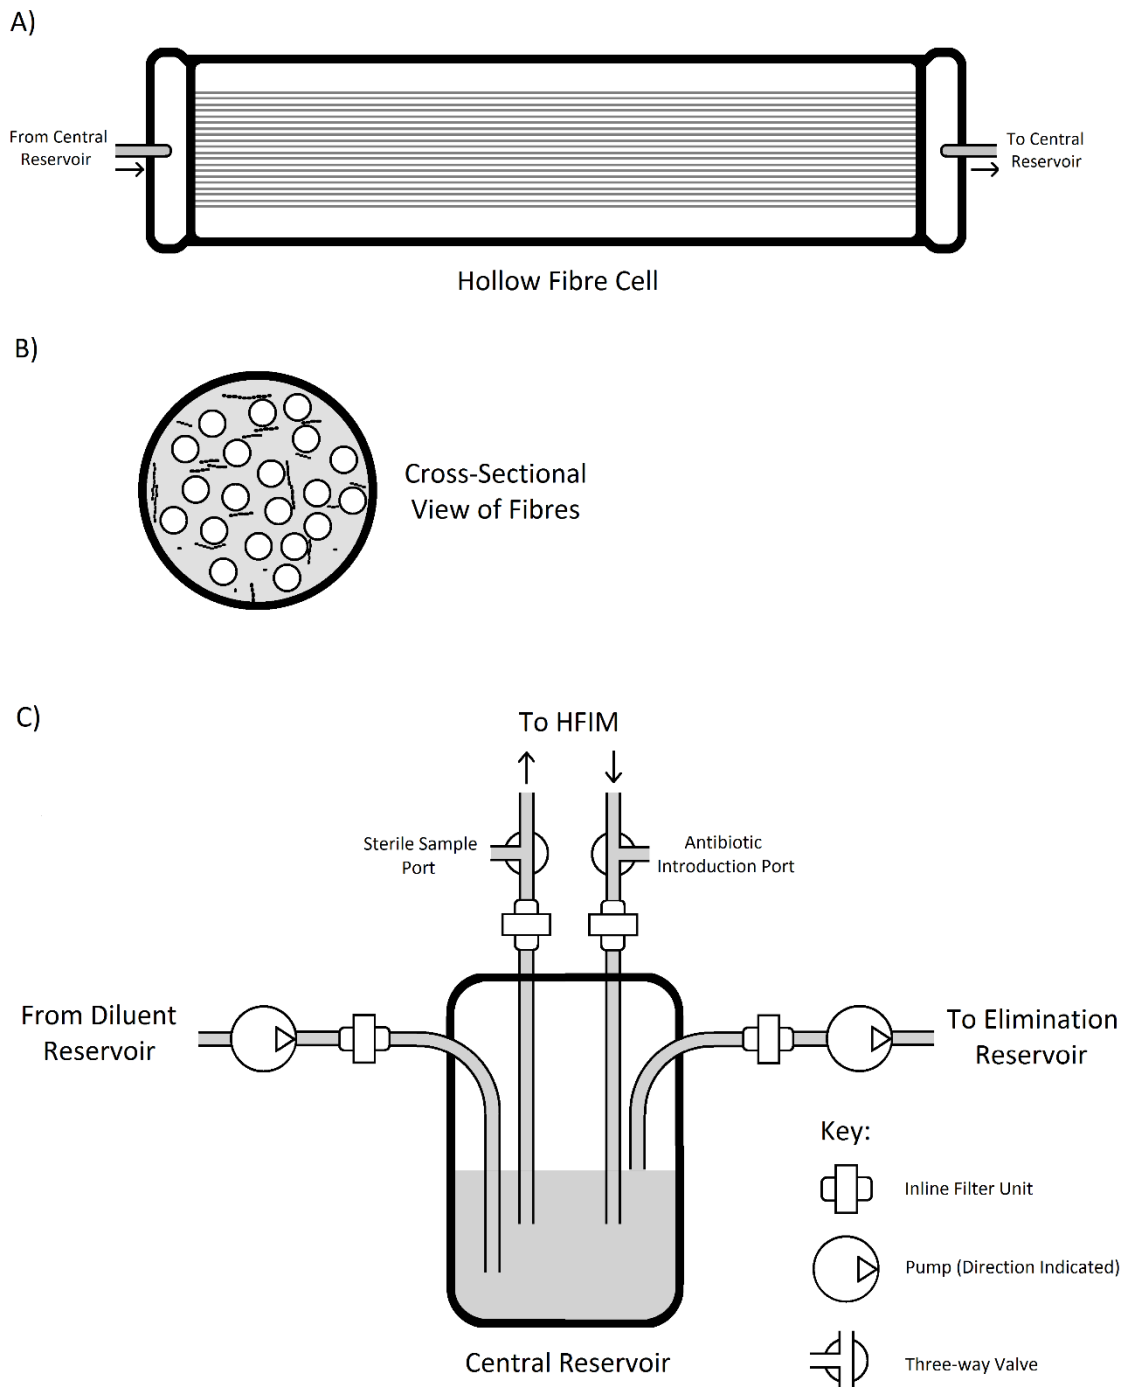

353

354 **Figure 1** - The central reservoir of the hollow fibre infection model with associated  
355 components. (A) Detail of the hollow fibre cell itself. Inputs are received on the left from the  
356 central reservoir and recirculated back to this reservoir on the right. (B) Cross-sectional view  
357 of a section of the hollow fibre cell. Bacteria are retained in the extracapillary space (grey)  
358 while media flows through the capillaries (white). (C) Outlines the overall layout of the HFIM.

359 **Figure 2.**

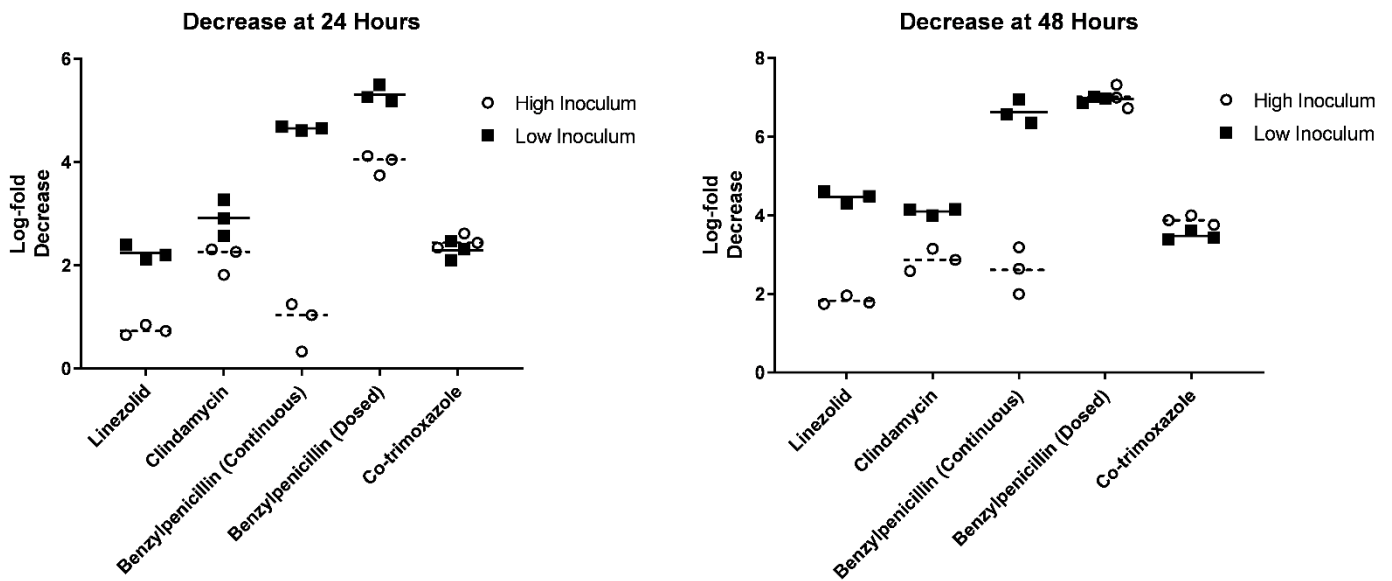

**Figure 2** - Decrease in cfu/mL between experimental groups with high and low initial inocula at 24 and 48 hours, respectively.

360 **Figure 3.**

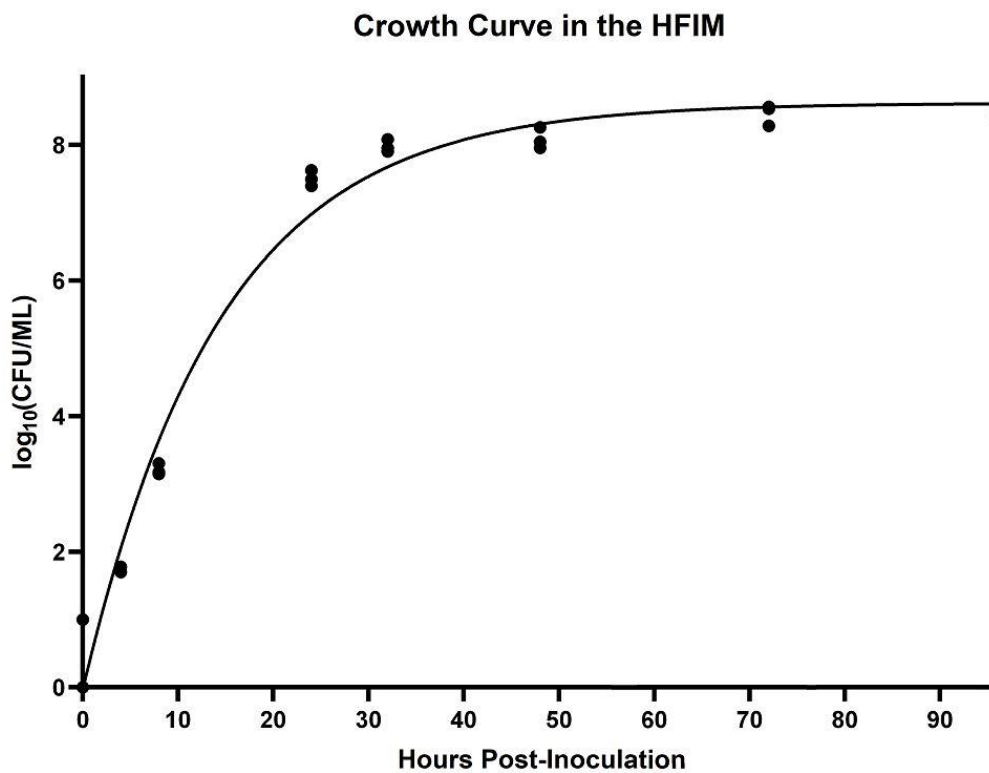

361

362 **Figure 3** – growth curve of strep A in the HFIM with no antibiotic. Regression was added via the  
363 method of least squares as a one-phase decay curve. In this model, bacteria enter the plateau phase at  
364 approximately 24 hours, at a density of 10<sup>8</sup> cfu/mL.
